# Supplementary material for: Local collection, reaction and analysis with theta pipette emitters
Source: Royal Society of Chemistry journal article supplement (doi:10.1039/c7an00109f), 2017-01-01
Supplement: c7an00109f1.pdf [file c7an00109f1.pdf]

## Supporting Information for Local Collection, Reaction and Analysis with Theta Pipette Emitters

Scheme 1: Chemical Structures of neutral flavonoid molecules detected post-protonation of *A. cepa* cytoplasm

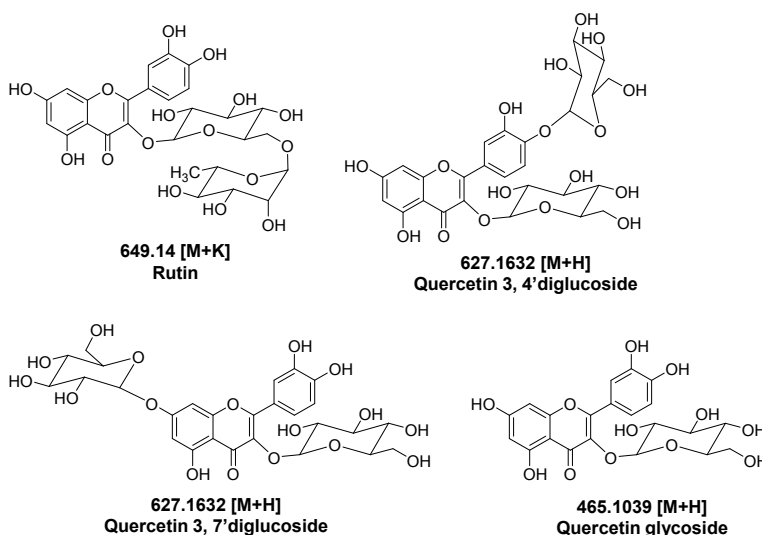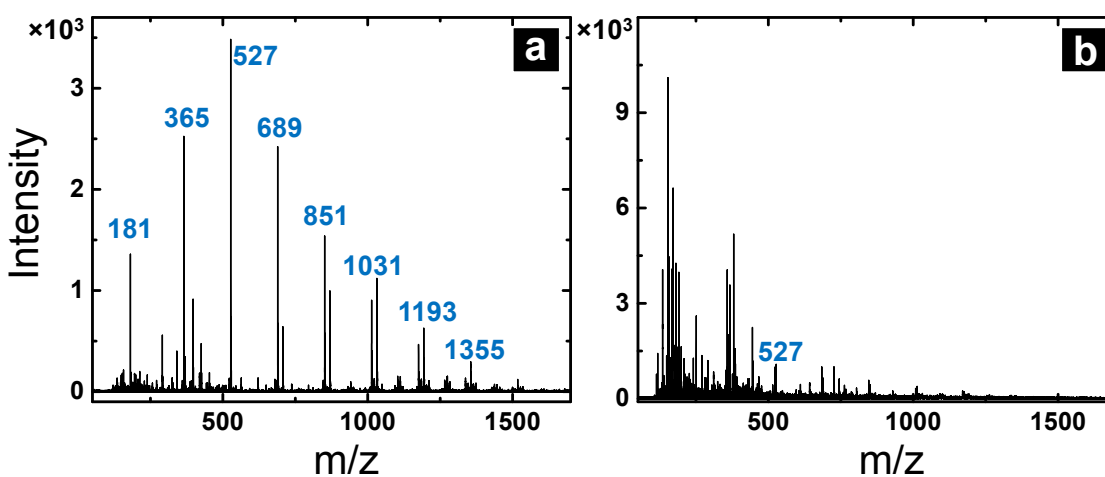

**Figure S1.** (a) Mass spectrum of dextran solution sampled and electrosprayed from a pipette before (a) and after (b) acid catalyzed degradation.

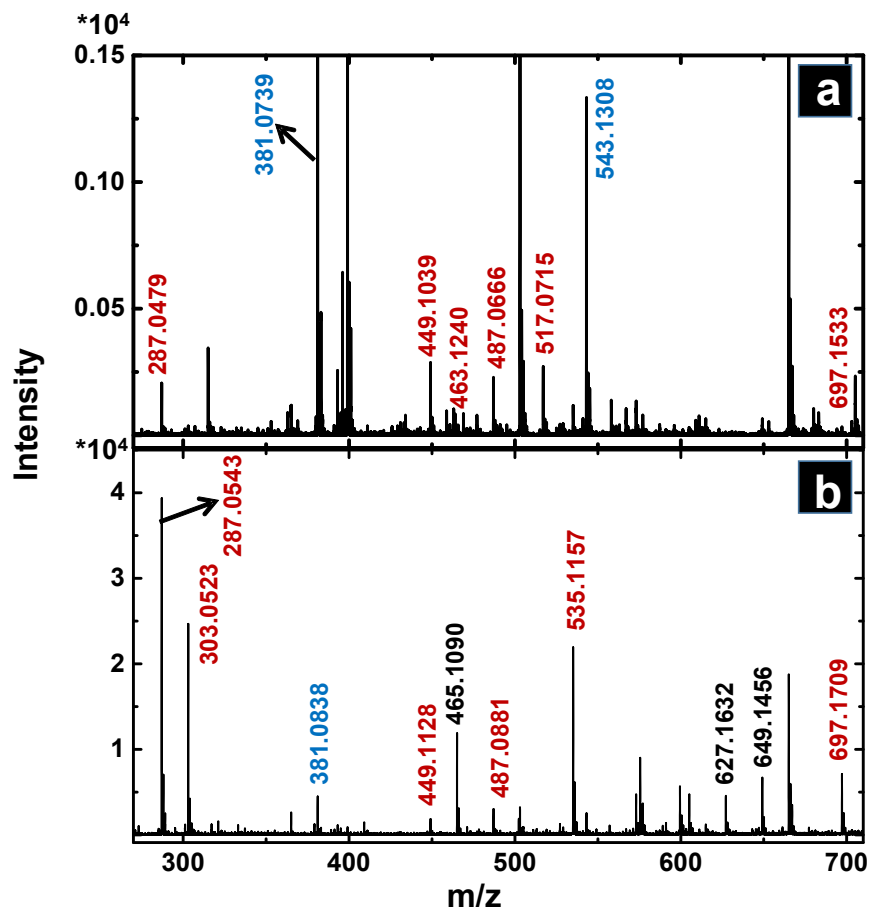

**Figure S2.** (a) Native *Allium cepa* cytoplasm and (b) after degradation of oligosaccharides. Peaks labelled in red correspond to anthocyanins, in blue are hexose oligosaccharides and in black are lipids.

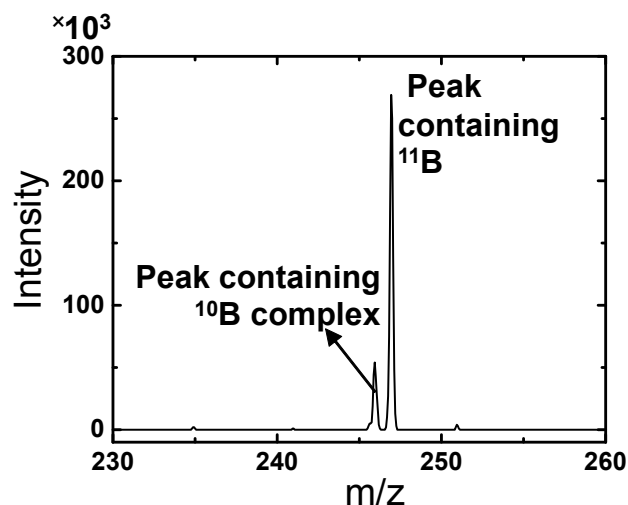

**Figure S3.** Mass spectrum showing unique isotopic pattern displayed by incorporation of one boron molecule. The peak shown here corresponds to PBA-monosaccharide complex zoomed-in from **Figure 3a**

When derivatization of oligosaccharides obtained from single *A. cepa* cells were attempted with a pipette having the conductive barrel of the pipette filled with pH 9 solution of 10  $\mu$ M PBA, the mass spectrum was dominated by peaks corresponding to dimers and trimers of PBA as shown below. Although, peaks corresponding to S-B complexes, for example m/z 265, could be isolated in the ion trap and subjected to tandem MS as shown in **Figure S2**, their intensities were low compared to PBA dimer and trimer peaks.

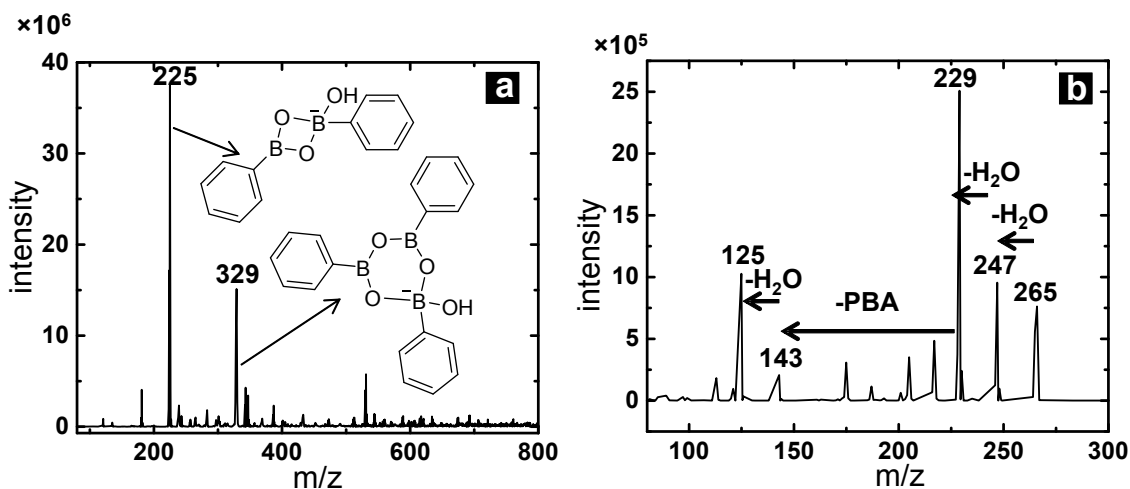

**Figure S4.** (a) Mass spectrum of sample collected from single *A. cepa* cell was subjected to PBA derivatization. The conductive barrel in this study was filled with pH 9 solution of 10  $\mu$ M PBA to enable S-B complexation. The peak at m/z 265 corresponding to monosaccharide-PBA complex

was isolated and subjected to tandem MS. (b) The MS showing the fragments obtained from  $m/z$  265.

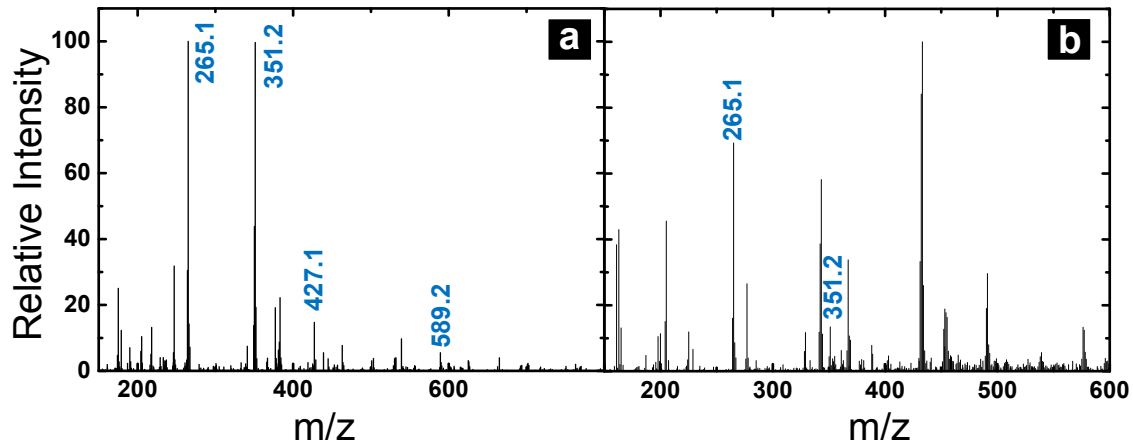

**Figure S5.** (a) Mass spectrum of *A. cepa* bulk extract containing hexose oligosaccharides that was subjected to phenylboronic acid (PBA) complexation at pH 9. (b) Mass spectrum of 10  $\mu\text{M}$  solution of galactose which was subjected PBA complexation at pH 9. Peak at 265 is monosaccharide-PBA complex, at 351 is bis-monosaccharide-PBA complex, at 427 is disaccharide-PBA complex and at 589 is trisaccharide-PBA complex.

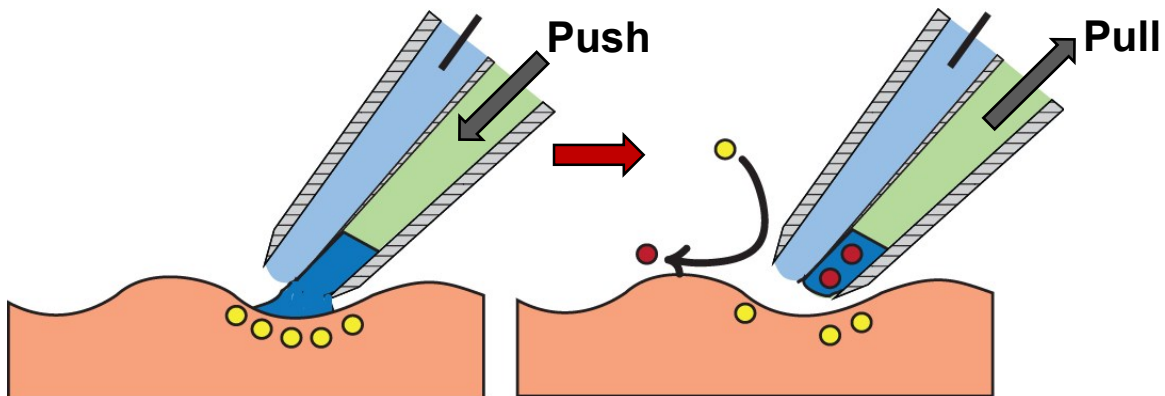

**Figure S6:** Schematic showing the strategy for local reactions on flat tissue sections such as *P. aeruginosa* biofilms.

**Table S1.** Tentative Peak assignments of saccharides and flavonoid from *Allium cepa* epidermal cell in Figure 1

| Assignment                           | Exact mass | Observed mass | $\Delta$ ppm |
|--------------------------------------|------------|---------------|--------------|
| Cyanidin                             | 287.0515   | 287.0498      | 6.9          |
| Delphinidin/quercetin+H <sup>+</sup> | 303.0505   | 303.0508      | 1            |
| Disaccharide+K <sup>+</sup>          | 381.0799   | 381.0727      | 18.8         |
| Cyanidin glucoside                   | 449.1006   | 449.1039      | 7.3          |
| Quercetin glucoside+H <sup>+</sup>   | 465.1033   | 465.1034      | 0.2          |
| Cyanidin malonyl glucoside           | 535.1087   | 535.1102      | 2.8          |
| Trisaccharide+K <sup>+</sup>         | 543.1328   | 543.1308      | 3.6          |
| Cyanidin malonyl acetoxy glucoside   | 577.1193   | 577.1322      | 22.3         |
| Quercetin diglycoside+H              | 627.1561   | 627.1728      | 20.5         |
| Rutin+K                              | 649.1170   | 649.1456      | 44           |
| Cyanidin malonyl diglucoside         | 697.1616   | 697.1626      | 1.4          |
| Tetrasaccharide+K <sup>+</sup>       | 705.1875   | 705.1875      | 0            |

**Table S2.** Tentative peak assignments for metabolites and rhamnolipids in *P. aeruginosa* biofilms

| Assignment                                          | Observed mass | Exact mass | $\Delta$ ppm |
|-----------------------------------------------------|---------------|------------|--------------|
| Pyocyanine (PYO)                                    | 211.0832      | 211.0871   | 18.4         |
| 2-heptyl-4-hydroxyquinolone (HHQ)                   | 244.1650      | 244.1701   | 20.1         |
| 2-heptyl-3-hydroxy-4-quinolone (PQS)                | 260.1608      | 260.1650   | 16.1         |
| 2-nonyl-4-hydroxyquinolone (NHQ)                    | 272.1972      | 272.2014   | 14.6         |
| C11:db-2-undecyl-4-hydroxyquinoline (UHQ)           | 298.2140      | 298.2170   | 10.0         |
| 2-undecyl-4-hydroxyquinoline <i>N</i> -oxide (UQNO) | 314.2017      | 314.2120   | 32.2         |
| Rhamnolipid (Rha) C10-C10+K                         | 543.3212      | 543.2935   | 50.1         |
| Rha-Rha C10-C10+K                                   | 689.3389      | 689.3514   | 18.1         |
